# Supplementary material for: A molecular dynamics study on adsorption mechanisms of polar, cationic, and anionic polymers on montmorillonite
Source: Royal Society of Chemistry journal article supplement (doi:10.1039/d2ra07341b), 2023-01-01
Supplement: d2ra07341b1.pdf [file d2ra07341b1.pdf]

Supporting Information  
for  
A Molecular Dynamics Study on Adsorption Mechanisms of  
Polar, Cationic, and Anionic Polymers on Montmorillonite

Yuanzhi Qu<sup>†1</sup>, Ling Lin<sup>†2</sup>, Shifeng Gao<sup>1</sup>, Yukun Yang<sup>2</sup>, Hongjun Huang<sup>1</sup>, Xin Li<sup>2</sup>,  
Han Ren<sup>1</sup>, and Wenjia Luo<sup>2\*</sup>

*1. CNPC Engineering Technology R&D Company Limited, Beijing, 102206, P. R. China*

*2. School of Chemistry and Chemical Engineering, Southwest Petroleum University, Chengdu, 610500, P.R. China*

† Yuanzhi Qu and Ling Lin contributed equally to this work

**\*Corresponding Author**

Dr. Wenjia Luo

Email: [luowenjia@swpu.edu.cn](mailto:luowenjia@swpu.edu.cn)

## 1. Molecular models of four polymers

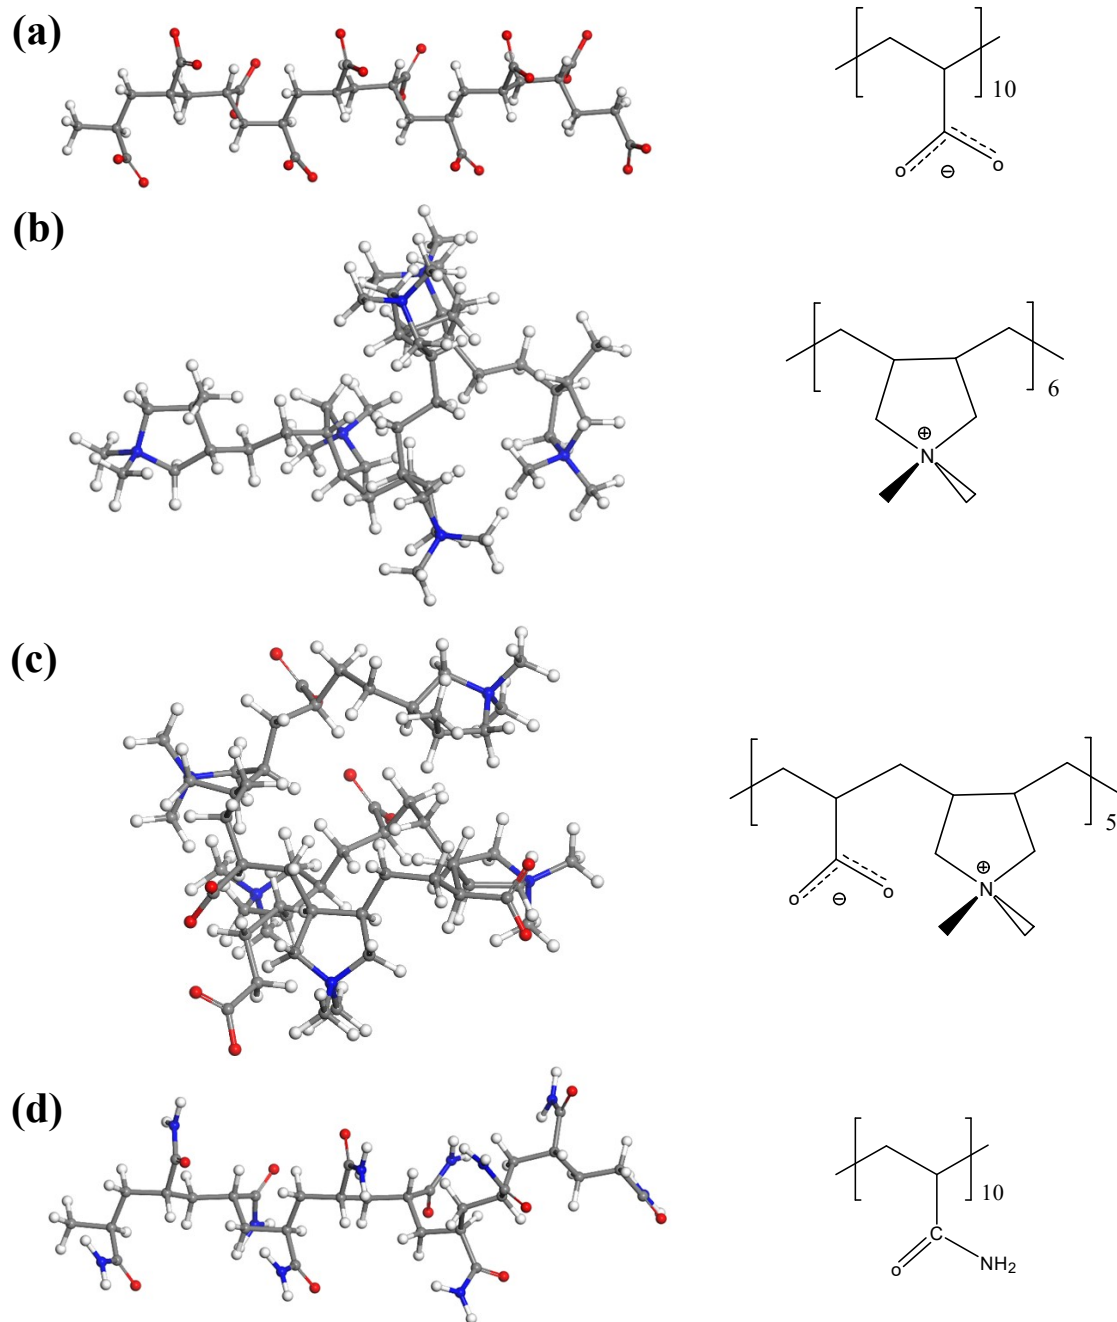

Figure S1. Structures of (a) poly-AA, (b) poly-DADMAC, (c) poly-AADADMAC, and (d) poly-AM chains. Red, gray, white, and blue represent O, C, H, and N atoms, respectively. For charged polymers poly-AA and poly-DADMAC, counter ions  $K^+$  and  $Cl^-$  are not shown in this figure but are added to the salt solutions to make the systems charge-neutral.

## 2. Effects of temperatures

Figure S2 shows the desorption behaviors of four polymers at different temperatures (275K, 300K, 400K, and 500K). This figure is intended to supplement Figure 2 in the main manuscript by providing the results of three separate MD runs under each simulation condition.

Table S1 lists the  $D_s$  of  $K^+$ ,  $Cl^-$ , polymer chains, and water under different temperatures. This table is intended to supplement Table 2 in the main manuscript. It is evident that  $D_s$  of  $K^+$ ,  $Cl^-$ , and water are similar under the same temperature no matter which polymer is present. However, the  $D_s$  values of polymer chains are rather different with stronger adsorbed chains having smaller  $D_s$  values.

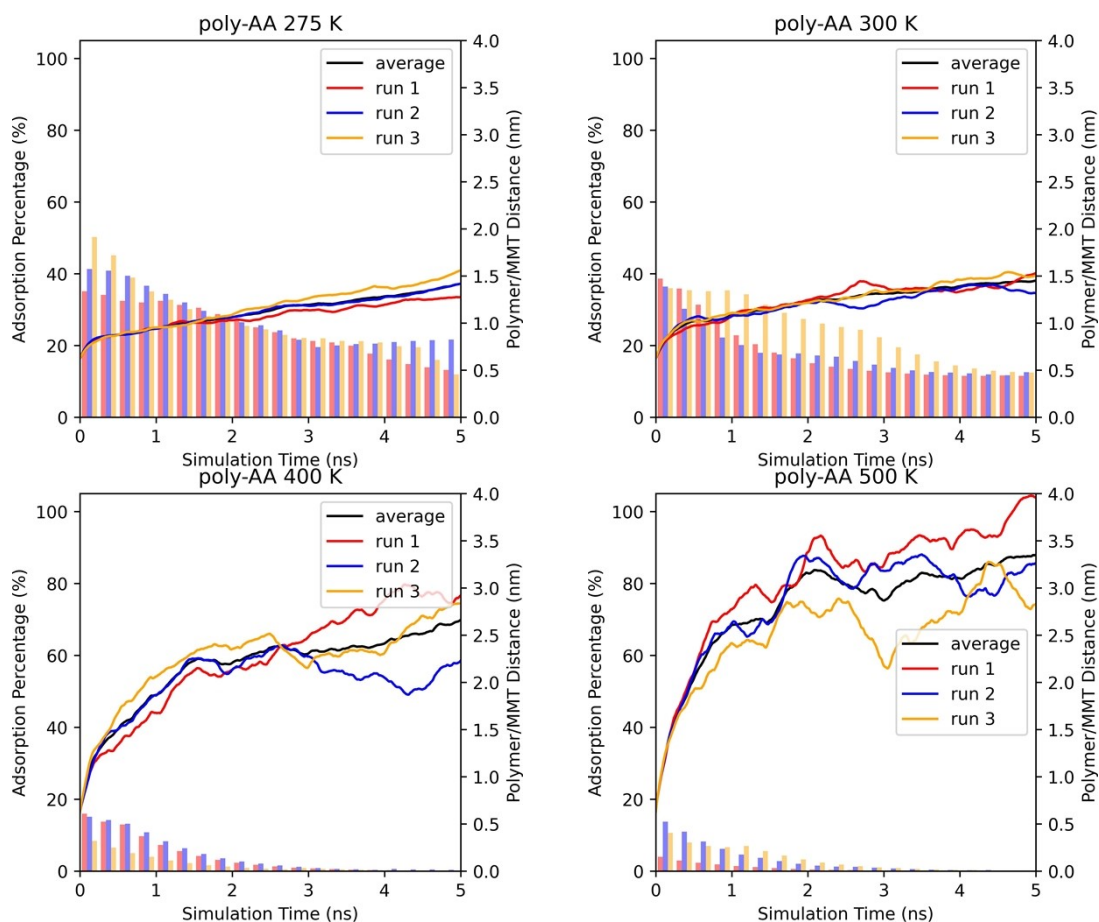

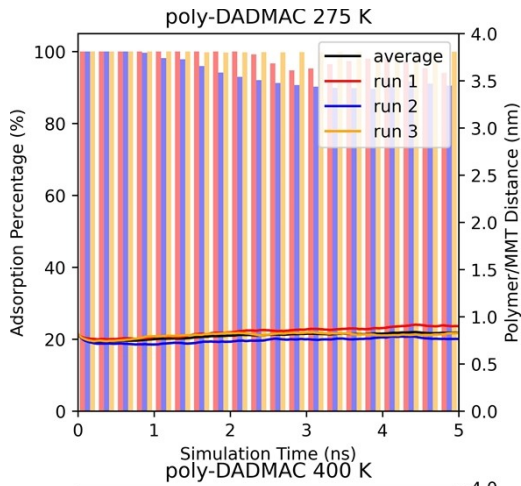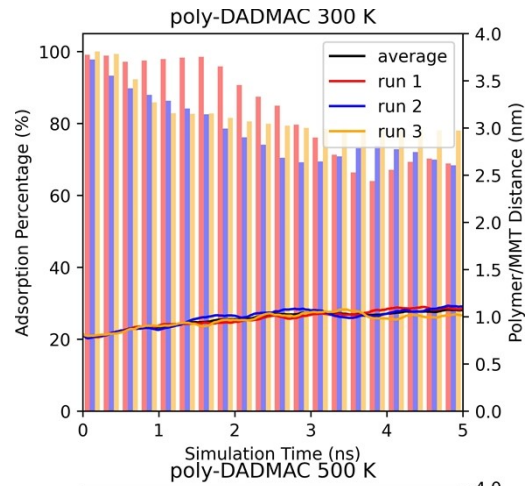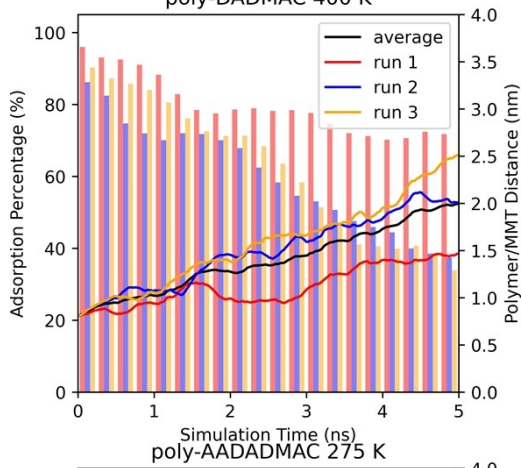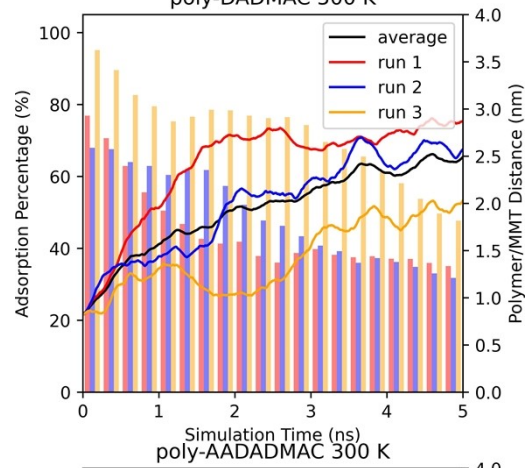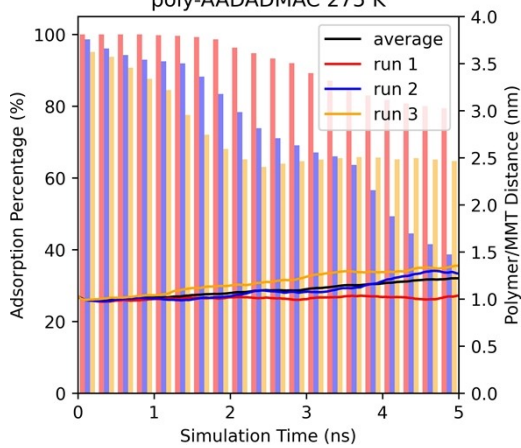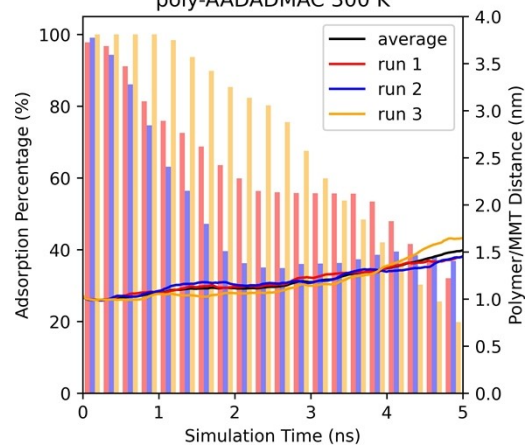

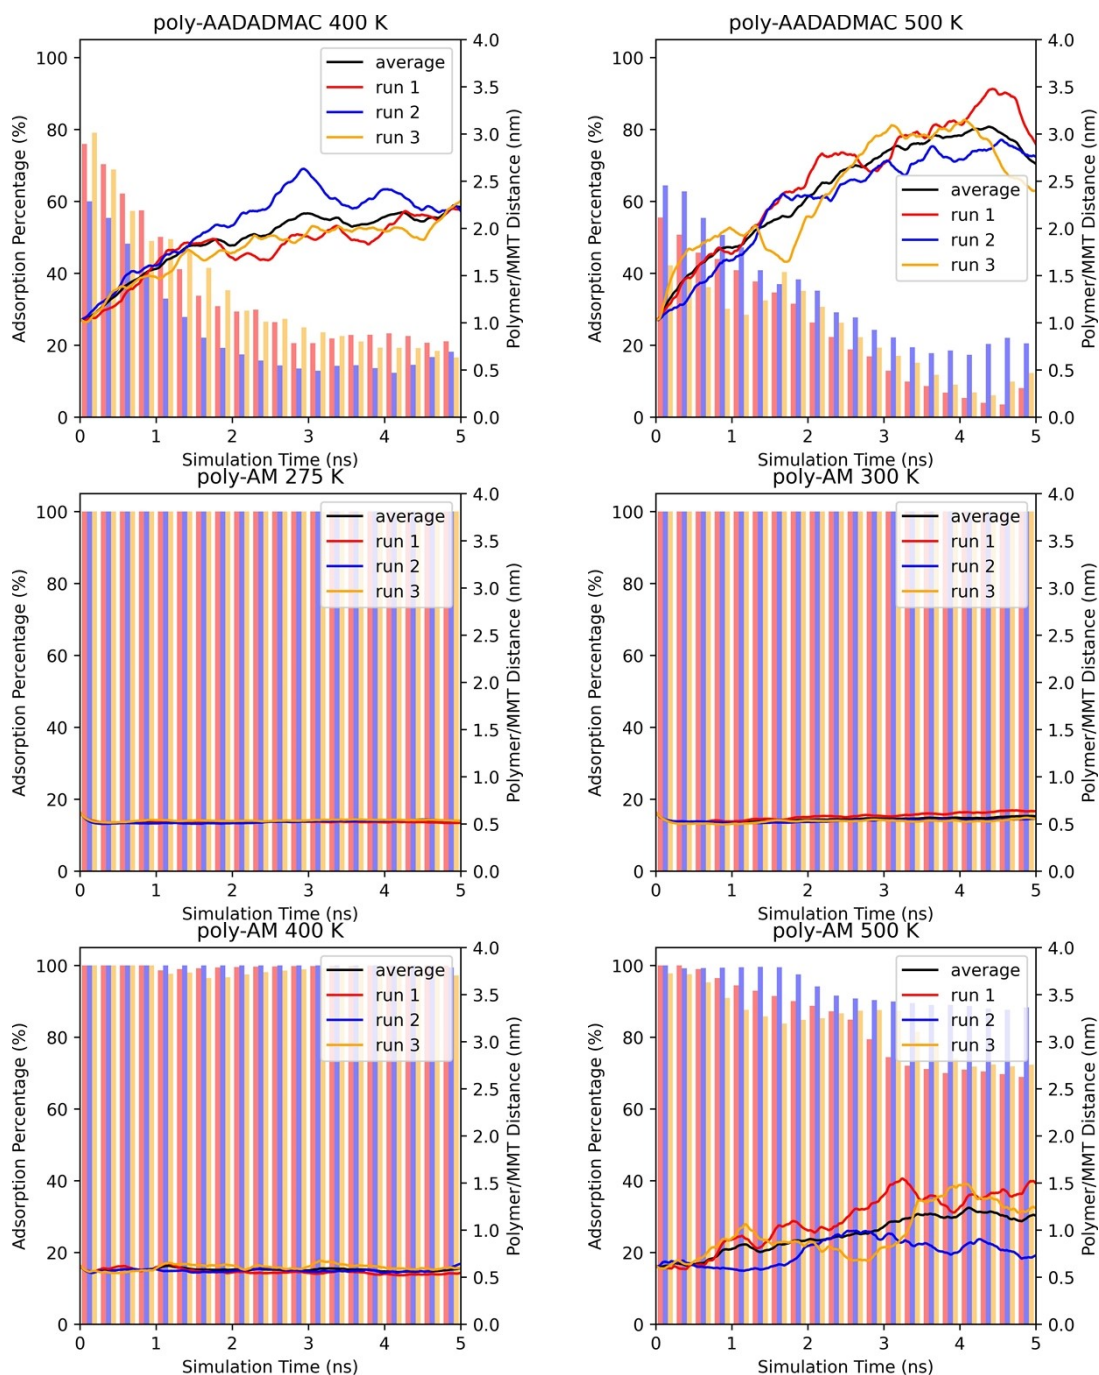

Figure S2. The polymer/MMT distances (curves, axis on the right) and the ratios of adsorbed polymer chains (bars, axis on the left) of four polymers at 275 K, 300 K, 400 K, and 500 K (16 cases). All simulations in this figure were performed with a 10 KCl wt% salt concentration and at 50 MPa pressure.

Table S1. The density of polymer/salt solution and  $D_s$  of  $K^+$ ,  $Cl^-$ , polymers chains, and water under different temperatures.\*

| Polymer       | T (K) | Density<br>(g/cm <sup>3</sup> ) | $D_s$ (10 <sup>-9</sup> m <sup>2</sup> /s) |        |                   |         |
|---------------|-------|---------------------------------|--------------------------------------------|--------|-------------------|---------|
|               |       |                                 | $K^+$                                      | $Cl^-$ | polymer<br>chains | water   |
| poly-AA       | 275   | 1.1208                          | 0.3111                                     | 0.3066 | 0.0527            | 0.4899  |
| poly-DADMAC   | 275   | 1.0971                          | 0.3122                                     | 0.2764 | 0.0158            | 0.4739  |
| poly-AADADMAC | 275   | 1.0976                          | 0.3228                                     | 0.3004 | 0.0377            | 0.5064  |
| poly-AM       | 275   | 1.1000                          | 0.3464                                     | 0.3355 | 0.0091            | 0.519   |
| poly-AA       | 300   | 1.1093                          | 0.542                                      | 0.5829 | 0.1014            | 0.9099  |
| poly-DADMAC   | 300   | 1.0856                          | 0.5995                                     | 0.5493 | 0.0513            | 0.9261  |
| poly-AADADMAC | 300   | 1.0863                          | 0.5317                                     | 0.5455 | 0.0615            | 0.9397  |
| poly-AM       | 300   | 1.0891                          | 0.5773                                     | 0.5323 | 0.0233            | 0.9754  |
| poly-AA       | 400   | 1.0388                          | 2.4737                                     | 2.6243 | 0.5059            | 4.5685  |
| poly-DADMAC   | 400   | 1.0183                          | 1.9866                                     | 2.3571 | 0.4728            | 4.418   |
| poly-AADADMAC | 400   | 1.0175                          | 2.0013                                     | 2.4568 | 0.4678            | 4.4786  |
| poly-AM       | 400   | 1.0210                          | 2.5375                                     | 2.8007 | 0.1264            | 4.7123  |
| poly-AA       | 500   | 0.9377                          | 5.5131                                     | 6.8107 | 2.4269            | 11.3472 |
| poly-DADMAC   | 500   | 0.9192                          | 5.5412                                     | 6.5436 | 1.2065            | 11.1709 |
| poly-AADADMAC | 500   | 0.9201                          | 5.085                                      | 6.0492 | 0.8268            | 10.9178 |
| poly-AM       | 500   | 0.9210                          | 5.1615                                     | 6.0597 | 0.9311            | 11.0687 |

\* All simulations in this table are at 50 MPa and with 10 wt% KCl.

### 3. Effects of pressures

Table S2. The density of polymer/salt solution and  $D_s$  of  $K^+$ ,  $Cl^-$ , polymers chains, and water under different pressures.\*

| Polymer       | P<br>(MPa) | Density<br>(g/cm <sup>3</sup> ) | $D_s$ (10 <sup>-9</sup> m <sup>2</sup> /s) |        |                   |        |
|---------------|------------|---------------------------------|--------------------------------------------|--------|-------------------|--------|
|               |            |                                 | $K^+$                                      | $Cl^-$ | polymer<br>chains | water  |
| poly-AA       | 20         | 1.0243                          | 2.5389                                     | 2.6277 | 0.6325            | 4.6898 |
| poly-AA       | 50         | 1.0388                          | 2.4737                                     | 2.6243 | 0.5059            | 4.5685 |
| poly-AA       | 200        | 1.0961                          | 2.1033                                     | 2.3932 | 0.4014            | 3.9778 |
| poly-DADMAC   | 20         | 1.0026                          | 2.9239                                     | 3.3362 | 0.5737            | 5.1414 |
| poly-DADMAC   | 50         | 1.0183                          | 1.9866                                     | 2.3571 | 0.4728            | 4.4180 |
| poly-DADMAC   | 200        | 1.0742                          | 1.8962                                     | 2.4684 | 0.4382            | 3.9851 |
| poly-AADADMAC | 20         | 1.0036                          | 1.9613                                     | 2.5227 | 0.5182            | 4.6086 |
| poly-AADADMAC | 50         | 1.0175                          | 2.0013                                     | 2.4568 | 0.4678            | 4.4786 |
| poly-AADADMAC | 200        | 1.0741                          | 1.5651                                     | 2.3218 | 0.5069            | 3.9729 |
| poly-AM       | 20         | 1.0062                          | 2.7822                                     | 2.9009 | 0.2010            | 5.0242 |
| poly-AM       | 50         | 1.0210                          | 2.5375                                     | 2.8007 | 0.1264            | 4.7123 |
| poly-AM       | 200        | 1.0790                          | 2.5489                                     | 2.5797 | 0.1563            | 4.2885 |

\* All simulations in this table are at 400 K and with 10 wt% KCl.

## 4. Effects of salinity

Figure 4 in the main manuscript demonstrates the desorption behaviors of polymers at 500 K. As a comparison, Figure S3 below shows the results at 275 K.

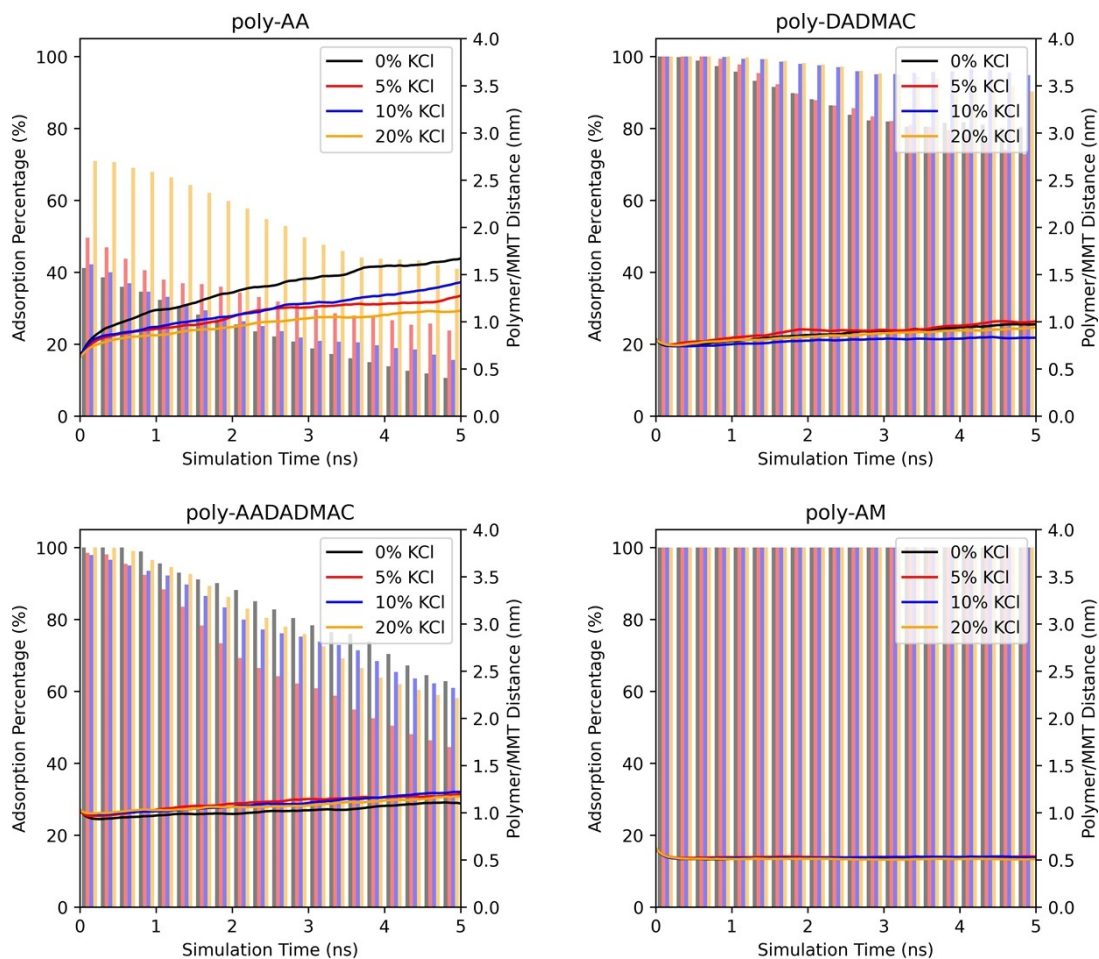

Figure S3. The polymer/MMT distances (curves, axis on the right) and the ratios of adsorbed polymer chains (bars, axis on the left) of four polymers under different KCl concentrations. All simulations in this figure were performed at 275 K and 50 MPa pressure.



Table S3.  $D_s$  of  $K^+$ ,  $Cl^-$ , polymers chains, and water under different KCl concentrations and temperatures.<sup>a</sup>

| Polymer       | T (K) | KCl <sup>b</sup><br>(wt %) | $D_s$ ( $10^{-9}$ m <sup>2</sup> /s) |        |                   |         |
|---------------|-------|----------------------------|--------------------------------------|--------|-------------------|---------|
|               |       |                            | $K^+$                                | $Cl^-$ | polymer<br>chains | water   |
| poly-AA       | 275   | 0                          | 0.2975                               | -      | 0.0691            | 0.5039  |
| poly-AA       | 275   | 5                          | 0.3197                               | 0.3084 | 0.0464            | 0.5006  |
| poly-AA       | 275   | 10                         | 0.3111                               | 0.3066 | 0.0527            | 0.4899  |
| poly-AA       | 275   | 20                         | 0.2527                               | 0.2519 | 0.0233            | 0.4291  |
| poly-DADMAC   | 275   | 0                          | -                                    | 0.2789 | 0.0287            | 0.514   |
| poly-DADMAC   | 275   | 5                          | 0.3154                               | 0.2977 | 0.0256            | 0.5089  |
| poly-DADMAC   | 275   | 10                         | 0.3122                               | 0.2764 | 0.0158            | 0.4739  |
| poly-DADMAC   | 275   | 20                         | 0.2745                               | 0.2536 | 0.0218            | 0.4361  |
| poly-AADADMAC | 275   | 0                          | -                                    | -      | 0.0256            | 0.5140  |
| poly-AADADMAC | 275   | 5                          | 0.3014                               | 0.3157 | 0.0219            | 0.5066  |
| poly-AADADMAC | 275   | 10                         | 0.3228                               | 0.3004 | 0.0377            | 0.5064  |
| poly-AADADMAC | 275   | 20                         | 0.2464                               | 0.2395 | 0.0232            | 0.4559  |
| poly-AM       | 275   | 0                          | -                                    | -      | 0.0083            | 0.5525  |
| poly-AM       | 275   | 5                          | 0.3321                               | 0.3141 | 0.0058            | 0.5373  |
| poly-AM       | 275   | 10                         | 0.3464                               | 0.3355 | 0.0091            | 0.5190  |
| poly-AM       | 275   | 20                         | 0.2939                               | 0.2783 | 0.0053            | 0.4694  |
| poly-AA       | 500   | 0                          | 5.0164                               | -      | 3.0270            | 13.3395 |
| poly-AA       | 500   | 5                          | 4.7940                               | 6.1801 | 1.0897            | 11.4852 |
| poly-AA       | 500   | 10                         | 5.5131                               | 6.8107 | 2.4269            | 11.3472 |
| poly-AA       | 500   | 20                         | 4.3849                               | 4.9149 | 1.3108            | 9.3031  |
| poly-DADMAC   | 500   | 0                          | -                                    | 5.9761 | 1.0113            | 12.2470 |
| poly-DADMAC   | 500   | 5                          | 4.8620                               | 6.6595 | 1.3979            | 11.8455 |
| poly-DADMAC   | 500   | 10                         | 5.5412                               | 6.5436 | 1.2065            | 11.1709 |
| poly-DADMAC   | 500   | 20                         | 4.5734                               | 5.0952 | 0.8976            | 9.4739  |
| poly-AADADMAC | 500   | 0                          | -                                    | -      | 2.2570            | 13.2665 |
| poly-AADADMAC | 500   | 5                          | 5.2066                               | 6.4398 | 1.5864            | 11.9313 |
| poly-AADADMAC | 500   | 10                         | 5.0850                               | 6.0492 | 0.8268            | 10.9178 |
| poly-AADADMAC | 500   | 20                         | 4.3857                               | 5.0773 | 1.2199            | 9.3176  |
| poly-AM       | 500   | 0                          | -                                    | -      | 1.1394            | 12.3378 |
| poly-AM       | 500   | 5                          | 3.9280                               | 7.4439 | 0.9045            | 11.6958 |
| poly-AM       | 500   | 10                         | 5.1615                               | 6.0597 | 0.9311            | 11.0687 |
| poly-AM       | 500   | 20                         | 4.4523                               | 4.8448 | 0.5926            | 9.5864  |

<sup>a</sup> All simulations in this table are at 50 MPa.

<sup>b</sup> In cases where the concentration of KCl equals 0%, there are still  $K^+$  ions in poly-AA solutions and  $Cl^-$  ions in poly-DADMAC solutions to counter the negative and positive charges carried by the polymer chains, respectively. In these cases, either  $Cl^-$  or  $K^+$  is absent from the system, and their  $D_s$  are shown as ‘-’ in the table.

## 5. Effects of salt types

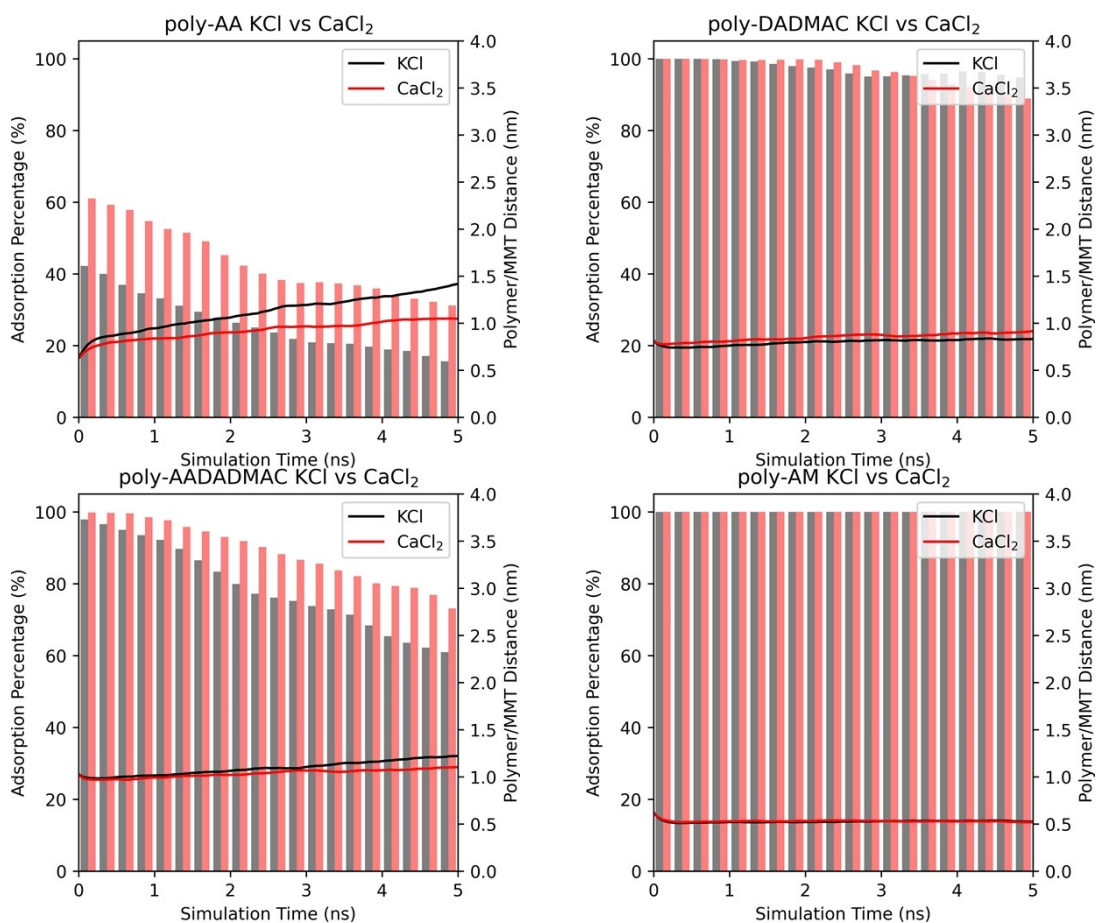

Figure S4. The polymer/MMT distances and the ratios of adsorbed polymer chains of four polymers as functions of MD simulation time in 10 wt% KCl and 7.54 wt% CaCl<sub>2</sub> solutions at 275 K and 50 MPa.

Table S4.  $D_s$  of cations,  $\text{Cl}^-$ , polymers chains, and water in KCl or  $\text{CaCl}_2$  solutions.<sup>a</sup>

| Polymer       | T (K) | Salt <sup>b</sup> | $D_s$ ( $10^{-9}$ m <sup>2</sup> /s) |               |                |         |
|---------------|-------|-------------------|--------------------------------------|---------------|----------------|---------|
|               |       |                   | $\text{K}^+$ or $\text{Ca}^{2+}$     | $\text{Cl}^-$ | polymer chains | water   |
| poly-AA       | 275   | KCl               | 0.3111                               | 0.3066        | 0.0527         | 0.4899  |
| poly-AA       | 275   | $\text{CaCl}_2$   | 0.1297                               | 0.2224        | 0.0189         | 0.3804  |
| poly-DADMAC   | 275   | KCl               | 0.3122                               | 0.2764        | 0.0158         | 0.4739  |
| poly-DADMAC   | 275   | $\text{CaCl}_2$   | 0.1035                               | 0.2306        | 0.022          | 0.386   |
| poly-AADADMAC | 275   | KCl               | 0.3228                               | 0.3004        | 0.0377         | 0.5064  |
| poly-AADADMAC | 275   | $\text{CaCl}_2$   | 0.0872                               | 0.2277        | 0.0193         | 0.3844  |
| poly-AM       | 275   | KCl               | 0.3464                               | 0.3355        | 0.0091         | 0.519   |
| poly-AM       | 275   | $\text{CaCl}_2$   | 0.1053                               | 0.2269        | 0.0067         | 0.3965  |
| poly-AA       | 500   | KCl               | 5.5131                               | 6.8107        | 2.4269         | 11.3472 |
| poly-AA       | 500   | $\text{CaCl}_2$   | 2.9594                               | 4.8637        | 1.331          | 10.3893 |
| poly-DADMAC   | 500   | KCl               | 5.5412                               | 6.5436        | 1.2065         | 11.1709 |
| poly-DADMAC   | 500   | $\text{CaCl}_2$   | 2.533                                | 4.8374        | 0.877          | 9.9246  |
| poly-AADADMAC | 500   | KCl               | 5.085                                | 6.0492        | 0.8268         | 10.9178 |
| poly-AADADMAC | 500   | $\text{CaCl}_2$   | 2.6273                               | 6.0456        | 1.3196         | 10.631  |
| poly-AM       | 500   | KCl               | 5.1615                               | 6.0597        | 0.9311         | 11.0687 |
| poly-AM       | 500   | $\text{CaCl}_2$   | 2.7439                               | 4.9962        | 0.5305         | 10.3349 |

<sup>a</sup> All simulations in this table are at 50 MPa.

<sup>b</sup> Salt concentrations are 10 wt% for KCl and 7.54 wt%  $\text{CaCl}_2$ , respectively.

## 6. Adsorption mechanisms at 275 K

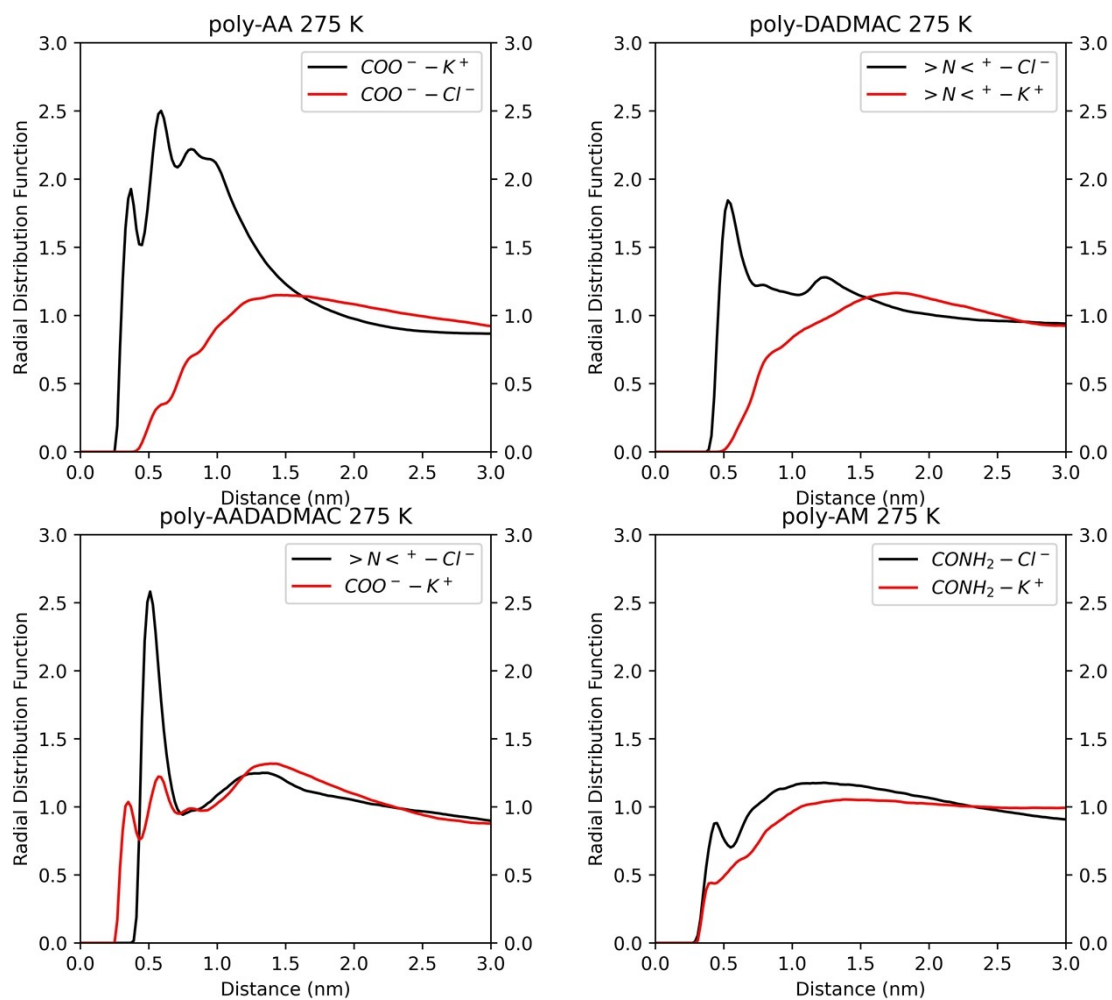

Figure S5. The radial distribution functions (RDFs) of four polymers adsorbed on

MMT at 275 K, 50 MPa, in 10 wt% KCl solutions.

## 7. Desorption under high temperatures

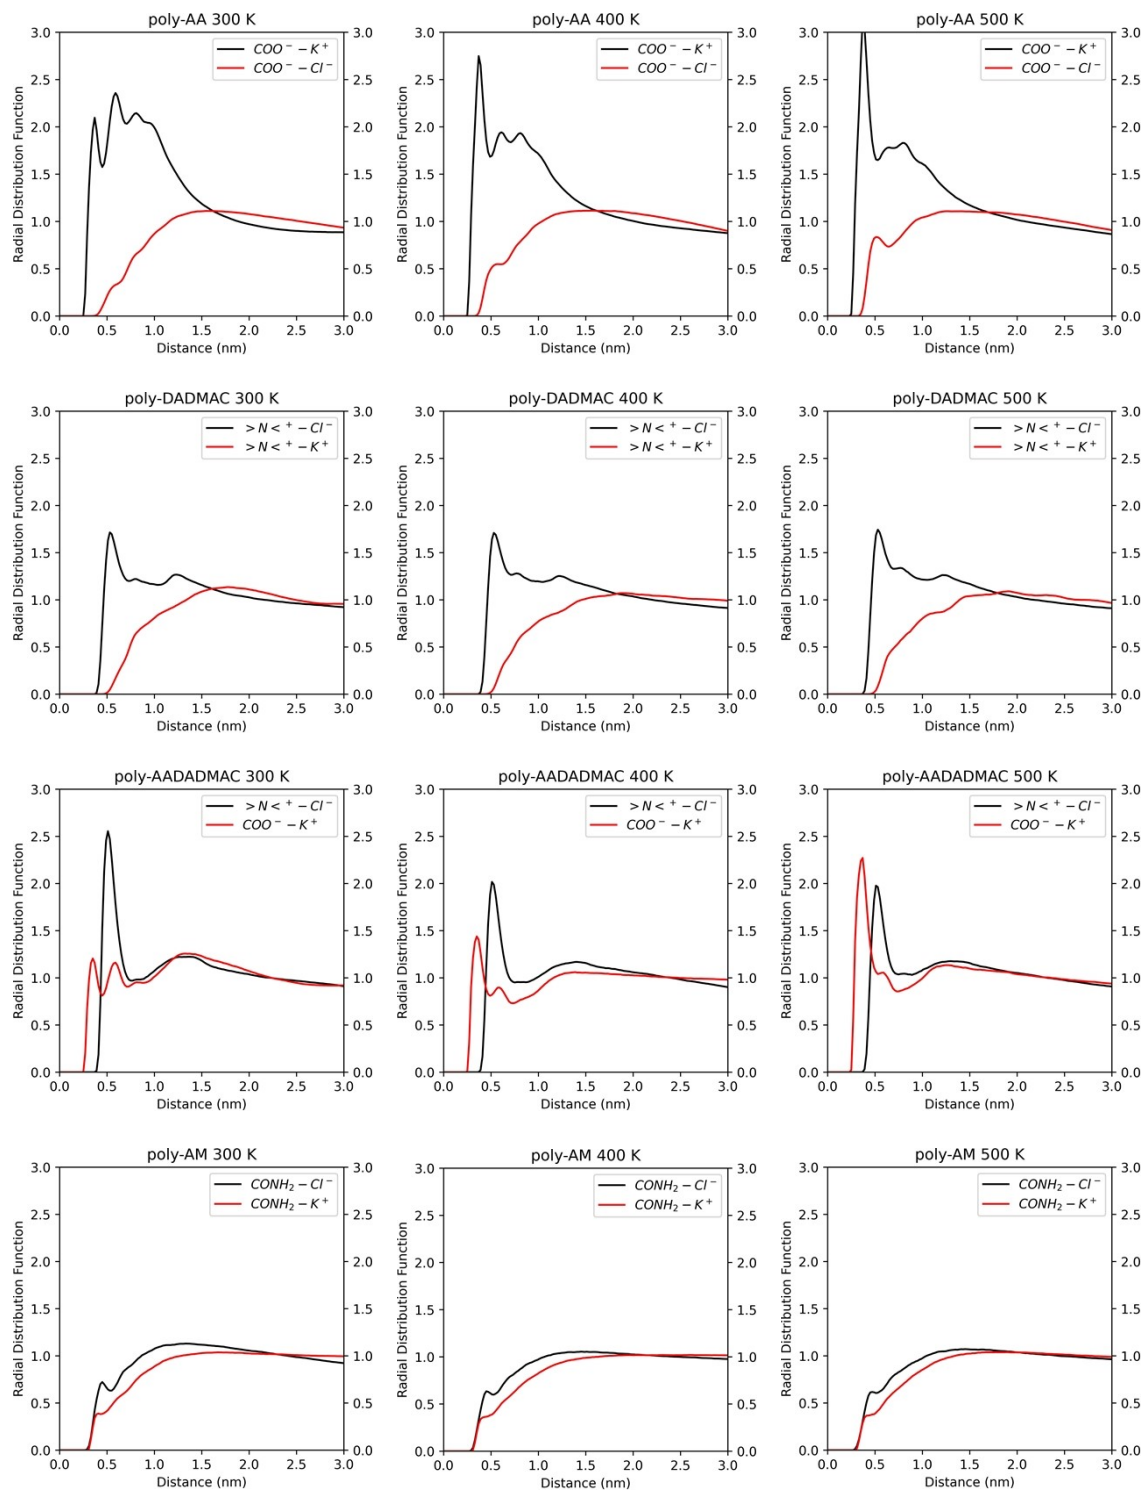

Figure S6. RDF of four polymers adsorbed on MMT at 300 K, 400 K, and 500 K.

All simulations in this figure are at 50 MPa, in 10 wt% KCl solutions.
